# Supplementary material for: Zinc Uptake by HIV-1 Viral Particles: An Isotopic Study
Source: MDPI journal article supplement (doi:10.3390/ijms242015274), 2023-10-17
Supplement: s1 [file s1]

# Supplementary Figure S1

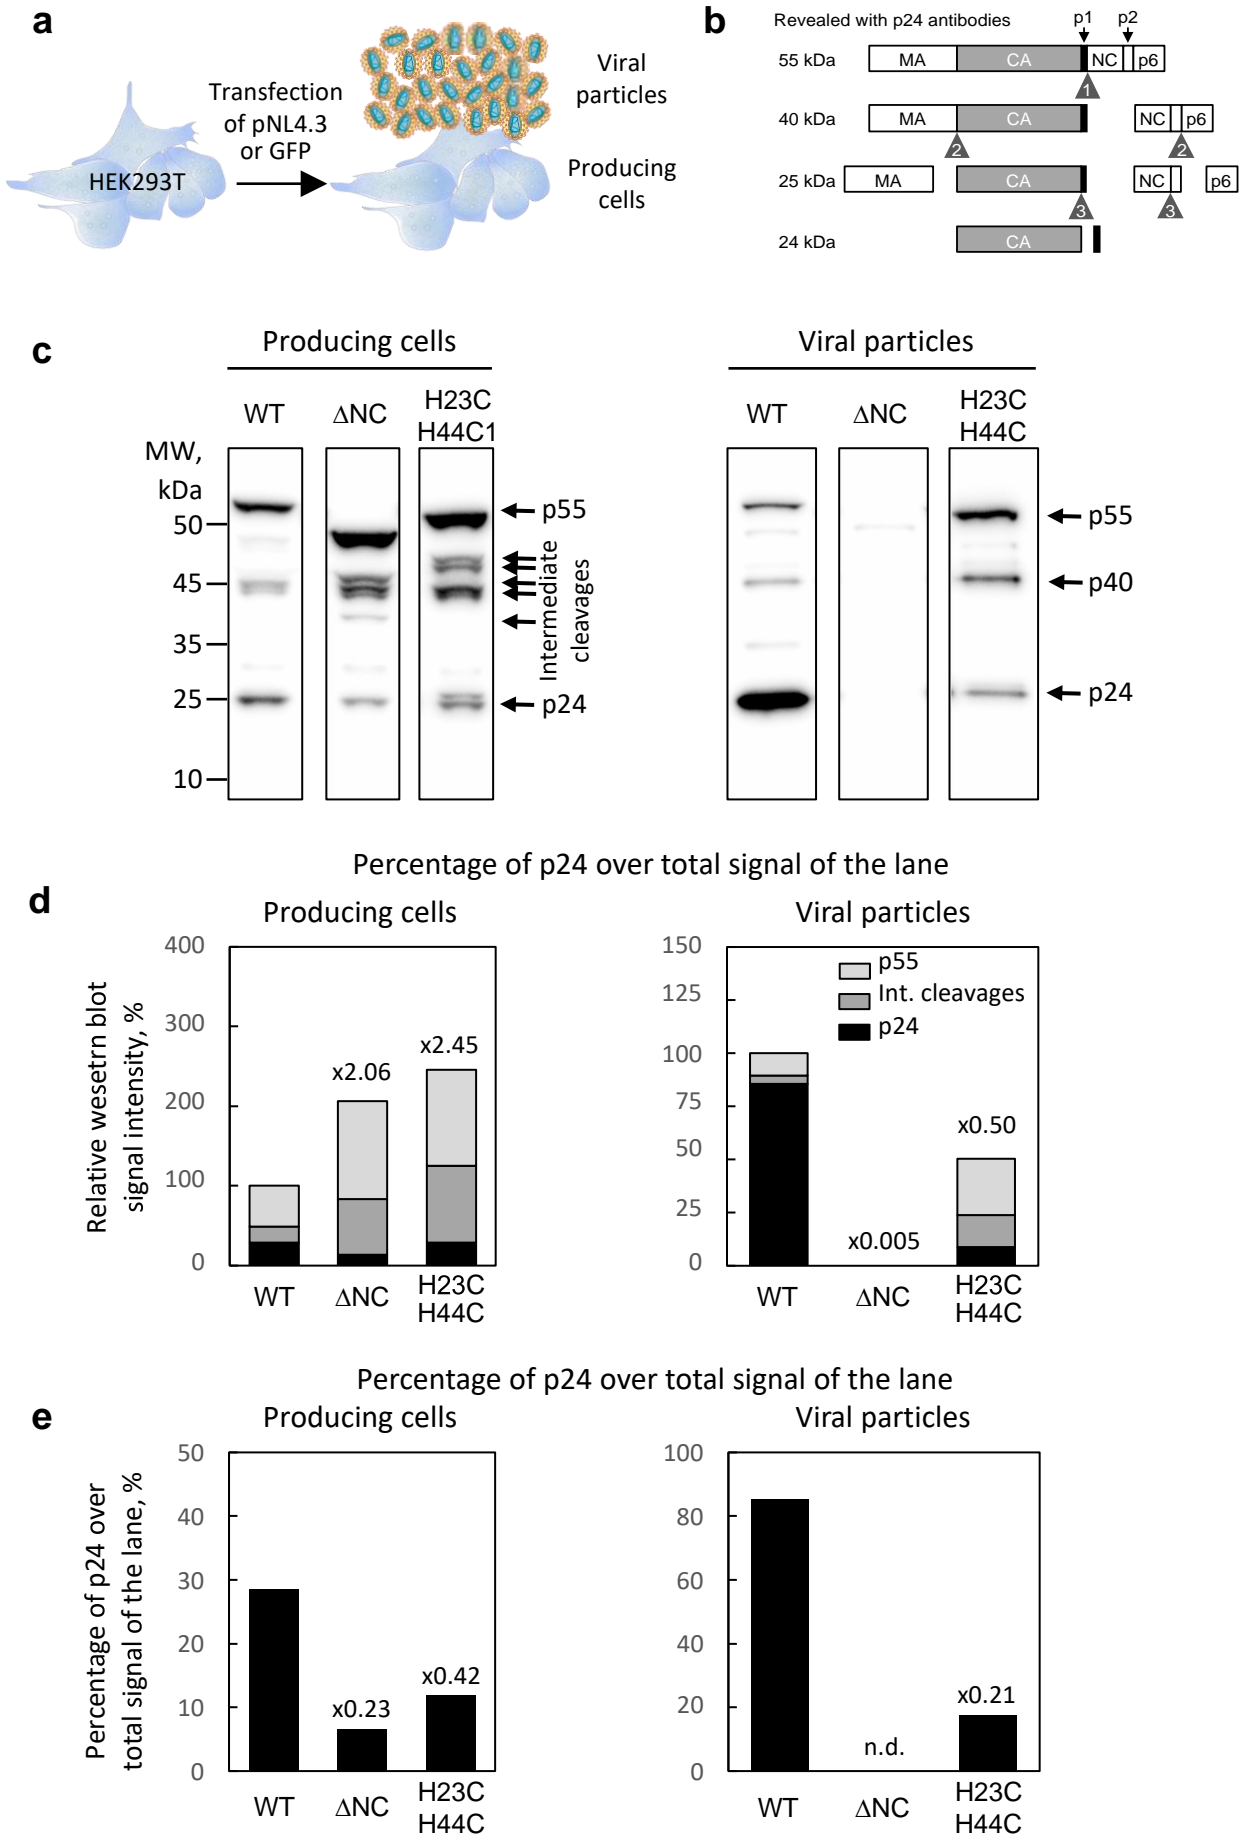

**Supplementary Figure S1.** Expression levels of GAG proteins after transfection of various pNL4.3 plasmids. (a) Experimental design: Different pNL4.3 plasmids were used in transfection to produce viral particles containing either the wild-type (WT) or a mutated version of NCp7. (b) Maturation scheme of the GAG polyprotein, with the portion revealed by the anti-p24 antibody (CA, p24) shown in gray. The NCp7 mutants include:  $\Delta$ ZF2, deletion of the zinc finger domain 2 (ZF2);  $\Delta$ NC, deletion of the entire NCp7; H23C, mutation of histidine 23 (ZF1 domain) to cysteine; H44C, mutation of histidine 44 (ZF2 domain) to cysteine; H23C/H44C, double mutation in the ZF1 and ZF2 domains. (c) Intracellular extracts and viral particles were analyzed by Western blot using anti-p24 antibodies, where the major proteins p55, p40, and p24 are indicated by arrows. With the different deletions, the sizes of precursor GAG proteins (p55) and partially cleaved forms differ from those of the wild-type track (other arrows). (d) Signal intensities were quantified using Imagemag software and represented in histogram form, with the first track (WT) taken as the reference at 100%. (e) Intensities of p24 (fully matured form of GAG in CA) are depicted in an independent histogram. The ratio compared to the first track is indicated in the two graphs above the bar.

**Supplementary Table S1. Isotopic composition of ZnCl<sub>2</sub> solutions derived from metallic zinc**

|                              | Isotopic composition |                  |                  |                  |                  |
|------------------------------|----------------------|------------------|------------------|------------------|------------------|
| Type of ZnCl <sub>2</sub>    | <sup>64</sup> Zn     | <sup>66</sup> Zn | <sup>67</sup> Zn | <sup>68</sup> Zn | <sup>70</sup> Zn |
| Natural                      | 48,63                | 27,90            | 4,10             | 18,75            | 0,62             |
| Enriched in <sup>64</sup> Zn | 99,1                 | 0,69             | 0,04             | 0,17             | 0,01             |
| Enriched in <sup>66</sup> Zn | 0,70                 | 98,00            | 1,20             | 0,09             | 0,01             |
| Enriched in <sup>67</sup> Zn | 1,56                 | 3,88             | 89,60            | 4,91             | 0,01             |
| Enriched in <sup>68</sup> Zn | 0,50                 | 0,70             | 0,50             | 98,30            | 0,001            |
| Enriched in <sup>70</sup> Zn | 8,36                 | 7,28             | 1,71             | 12,45            | 70,20            |
